# Supplementary material for: 2D petal-like PdAg nanosheets promote efficient electrocatalytic oxidation of ethanol and methanol
Source: Royal Society of Chemistry journal article supplement (doi:10.1039/d4nr01537a), 2024-01-01
Supplement: d4nr01537a1.pdf [file d4nr01537a1.pdf]

## 2D Petal-Like PdAg Nanosheets Promote Efficient Electrocatalytic Oxidation of Ethanol and Methanol

Yuhua Xu<sup>a, b</sup>, Jie Li<sup>a</sup>, Mengyu Hu<sup>a</sup>, Zhengying Wu<sup>\*, c</sup>, Yukou Du<sup>\*, a</sup>

<sup>a</sup>*College of Chemistry, Chemical Engineering and Materials Science, Soochow University, Suzhou 215123, China*

<sup>b</sup>*The school of science, Xi'an Jiaotong-liverpool University, Suzhou 215028, China*

<sup>c</sup>*Jiangsu Key Laboratory for Environment Functional Materials, School of Materials Science and Engineering, Suzhou University of Science and Technology, Suzhou 215009, China*

\* *Corresponding author: E-mail: zywu@mail.usts.edu.cn (Z. Wu); duyk@suda.edu.cn (Y. Du)*

### Experimental section

**Preparations of PdAg NSs and Pd NSs.** In a synthesis of PdAg<sub>1.5</sub> NSs, Na<sub>2</sub>PdCl<sub>4</sub> (7.3 mg), Mo (CO)<sub>6</sub> (20 mg), hexadecyl trimethyl ammonium chloride (41mg), AgNO<sub>3</sub> (1.5 mg), polyvinyl pyrrolidone (40 mg), 2.5 mL benzyl alcohol and 500 μL acetylacetone were added into a glass bottle (volume: 35 mL). After ultrasonication for about 50 minutes, the mixture was then heated to 100 °C and maintained for 3 h in an oil bath. The synthesis of Pd NSs was similar to that of PdAg<sub>1.5</sub> NSs, except without the addition of AgNO<sub>3</sub>. The synthesis of PdAg<sub>0.5</sub> and PdAg<sub>1</sub> NSs was similar to that of PdAg<sub>1.5</sub> NSs, except the addition of 0.5 mg and 1 mg AgNO<sub>3</sub>.

**Electrochemical tests.** The electrochemical measurements of all catalysts were performed at a three-electrode system. a saturated calomel electrode (SCE), a glassy carbon electrode (GCE) (diameter: 5 mm, area: 0.196 cm<sup>2</sup>), and a Pt wire were used as the reference, working, and counter electrodes, respectively. The ECSAs were determined by the reduction peak of PdO in cycle voltammetry curves with 50 mV s<sup>-1</sup> in 1 M KOH. EOR and MOR performance tests were performed in 1 M KOH + 1 M

ethanol at 50 mV s<sup>-1</sup> and 1 M KOH + 1 M methanol, respectively.

### **Characterizations**

Transmission electron microscopy (TEM) was conducted on a HITACHI HT7700 transmission electron microscope at an accelerating voltage of 120 kV. High-resolution TEM (HRTEM) and HAADF-STEM images were implemented on an Tolos F200X G2 field emission transmission electron microscope operated at 200 kV. An X'Pert-Pro MPD diffractometer (PANalytical, Netherlands) was used to collect the X-ray diffraction (XRD) patterns. X-ray photoelectron spectroscopy (XPS) was used to investigate the surface composition the products on Thermo Scientific, ESCALAB 250 XI.

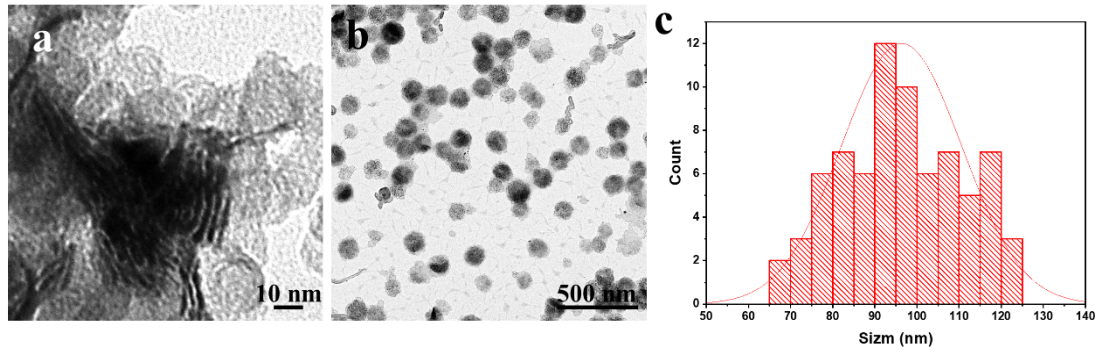

**Fig. S1** (a) TEM of erect nanosheets, (b, c) TEM image and corresponding histogram of diameter distribution of PdAg<sub>1.5</sub> NSs.

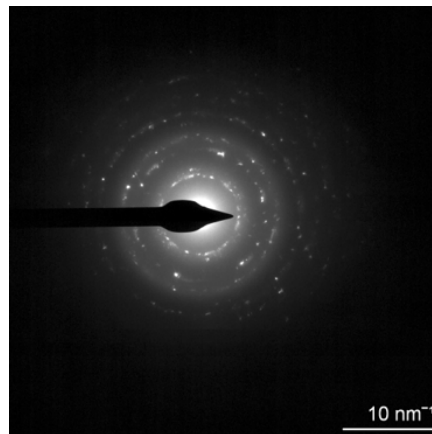

**Fig. S2** SAED pattern of PdAg NSs.

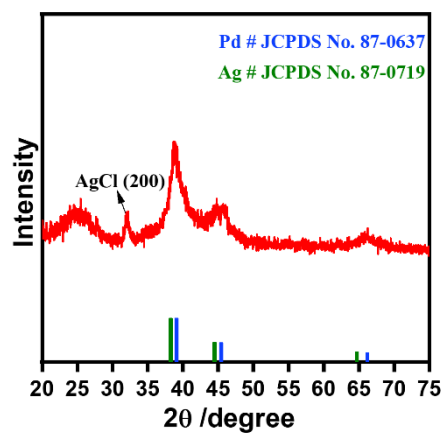

**Fig. S3** XRD pattern of PdAg<sub>1.5</sub> NSs.

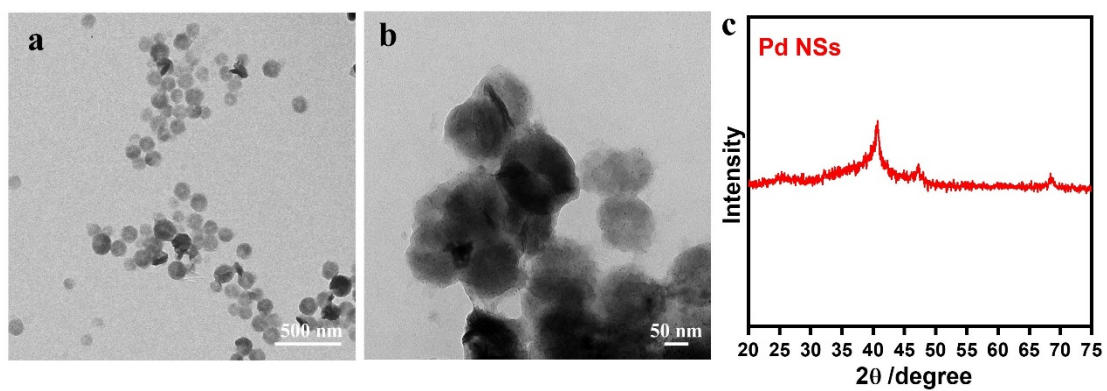

Fig. S4 (a, b) TEM image, (c) XRD pattern of Pd NSs.

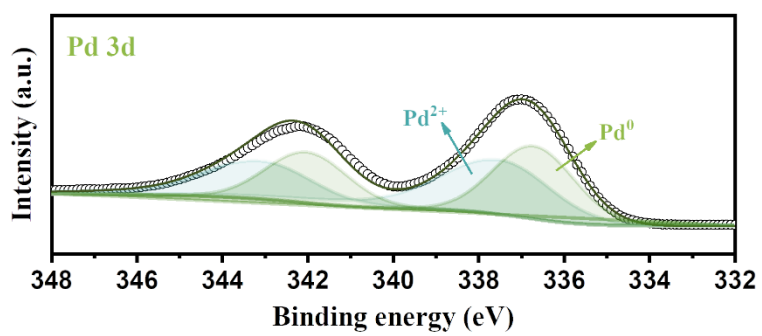

Fig. S5 (f) Pd 3d XPS spectra of Pd NSs.

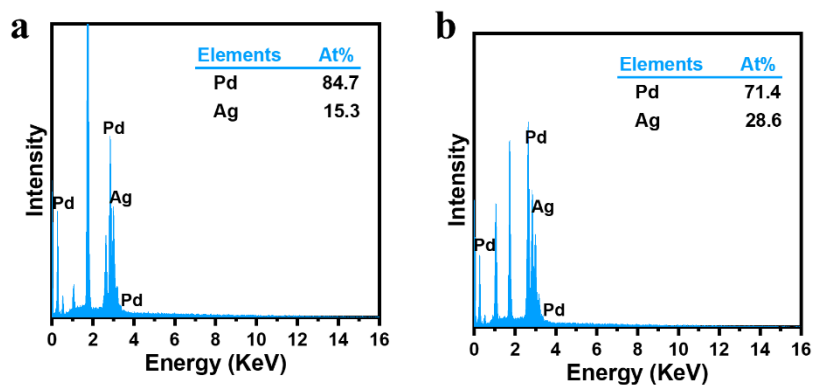

**Figure S6.** EDS pattern of PdAg<sub>1.5</sub> NSs intermediate products collected at 5 min (a), 25 min (b).

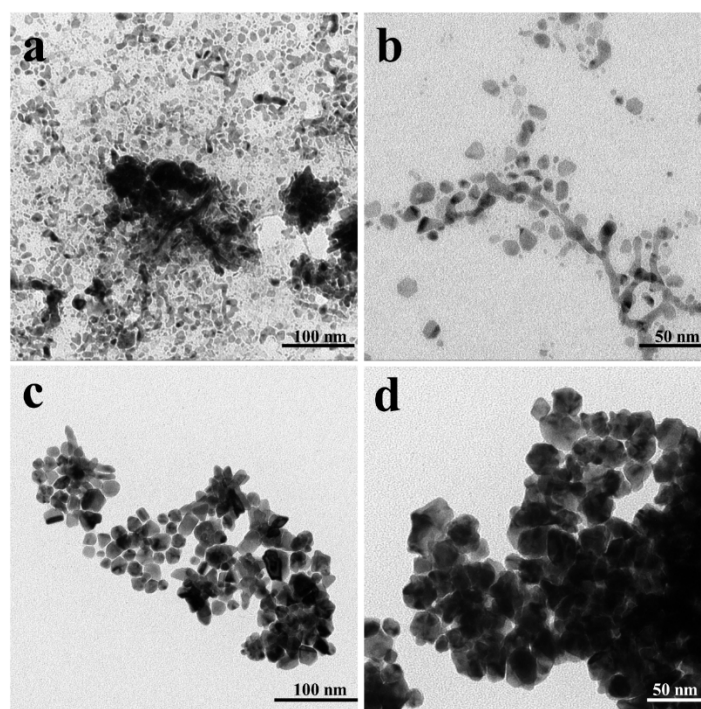

**Fig. S7** (a, b) TEM images of the products in the absence of CTAC. (c, d) TEM images of the products in the absence of Mo(CO)<sub>6</sub>.

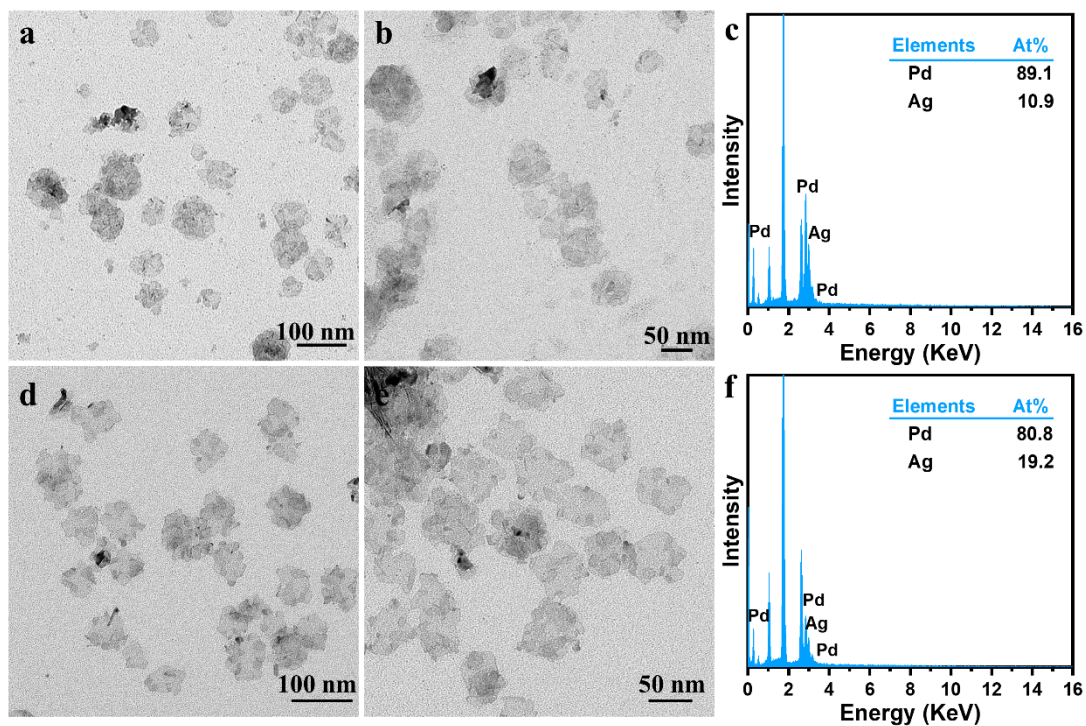

**Fig. S8** (a, b, c) TEM images and EDS spectrum of PdAg<sub>0.5</sub> NSs with the use of 0.5 mg AgNO<sub>3</sub>. (d, e, f) TEM images and EDS spectrum of PdAg<sub>1</sub> NSs with the use of 1 mg AgNO<sub>3</sub>.

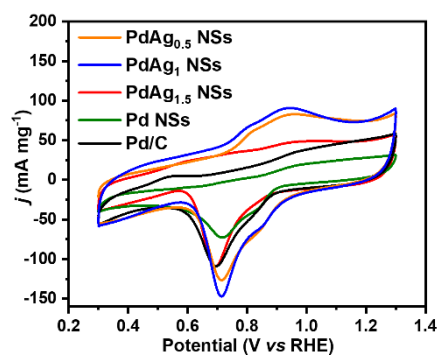

**Figure S9.** CV curve in 1 M KOH solution.

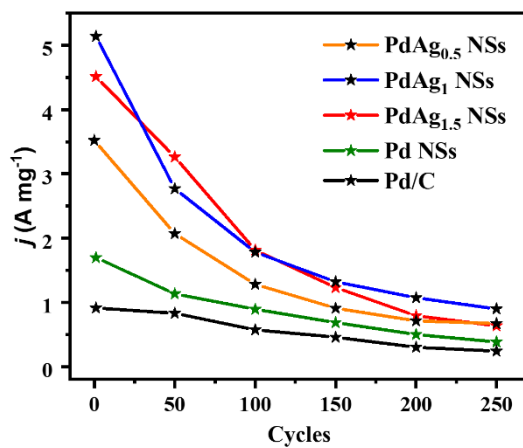

**Figure S10.** The mass activity variation during the consecutive CV tests of PdAg<sub>0.5</sub> NSs, PdAg<sub>1</sub> NSs, PdAg<sub>1.5</sub> NSs, Pd NSs, and Pd/C catalysts toward EOR.

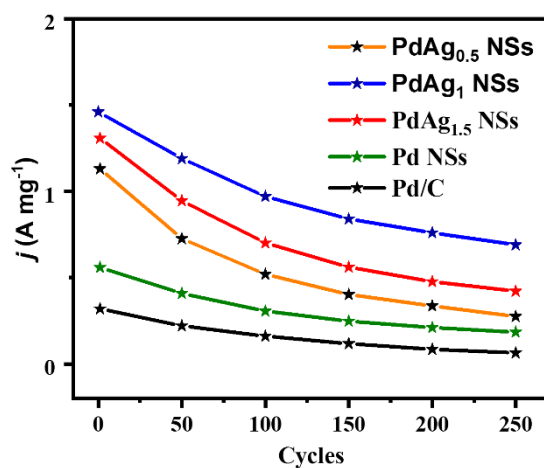

**Fig. S11** The mass activity variation during the consecutive CV tests of PdAg NSs, Pd NSs, and Pd/C catalysts toward EOR.

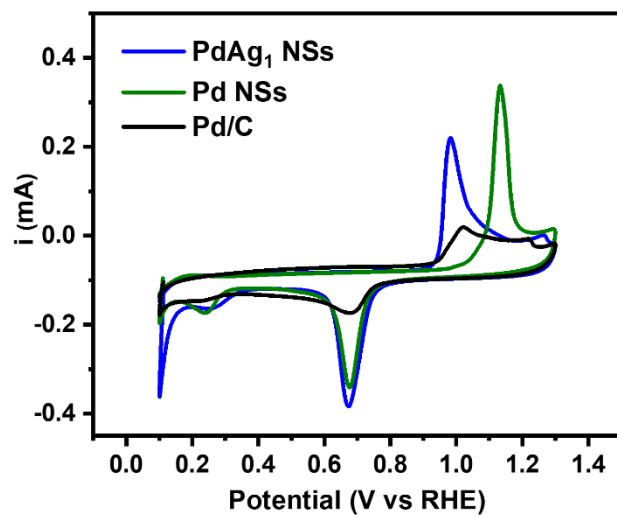

**Fig. S12** CO stripping curves of PdAg<sub>1</sub> NSs, Pd NSs, and Pd/C in 0.1 M HClO<sub>4</sub> electrolyte at room temperature with a scan rate of 20 mV s<sup>-1</sup>.

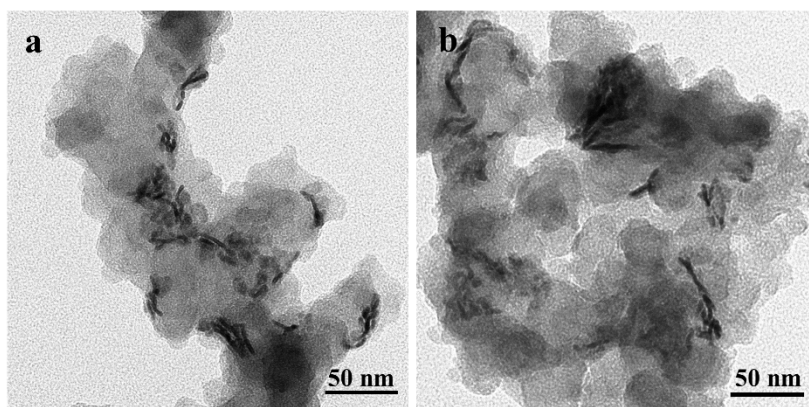

**Fig. S13** TEM image of PdAg NSs/C before (a), after (b) electrochemical tests.



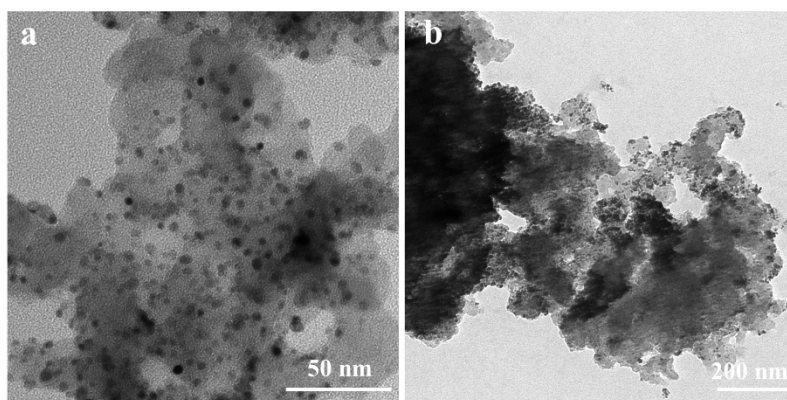

**Fig. S14** TEM image of Pd/C before (a), after (b) electrochemical tests.
